# Supplementary material for: Synthesis, characterization, and photocatalytic CO2 reduction evaluation of the CaWxMo1−xO4 (x = 0–1) solid solution
Source: Royal Society of Chemistry journal article supplement (doi:10.1039/d3nj00037k), 2023-01-01
Supplement: d3nj00037k1.pdf [file d3nj00037k1.pdf]

## Supporting Information

### Synthesis, characterization, and potential photocatalytic CO<sub>2</sub> reduction application of the CaW<sub>x</sub>Mo<sub>1-x</sub>O<sub>4</sub> (x = 0 – 1) solid solution

Luis F. Garay-Rodríguez<sup>a</sup>, Luz I. Ibarra-Rodríguez<sup>b</sup>, Leticia M. Torres-Martínez<sup>a,c\*</sup>, I. Juárez-Ramírez<sup>a</sup>

Table S1. Summary of the structural results obtained from Rietveld Refinement

| Sample                             | Atom | x      | y      | z      | Occupancy | U iso  | R <sub>wp</sub> | R <sub>exp</sub> | χ <sup>2</sup> |
|------------------------------------|------|--------|--------|--------|-----------|--------|-----------------|------------------|----------------|
| CaMoO <sub>4</sub>                 | Ca   | 0.0    | 0.2504 | 0.6254 | 1.0       | 0.5566 | 8.82            | 13.27            | 0.66           |
|                                    | Mo   | 0.0    | 0.2504 | 0.1248 | 1.0       | 0.8566 |                 |                  |                |
|                                    | O    | 0.1537 | 0.0    | 0.2080 | 1.0       | 0.6496 |                 |                  |                |
| W <sub>0.2</sub> Mo <sub>0.8</sub> | Ca   | 0.0    | 0.2495 | 0.6254 | 1.0       | 0.1592 | 6.76            | 5.41             | 1.24           |
|                                    | Mo   | 0.0    | 0.2503 | 0.1254 | 0.8004    | 0.1593 |                 |                  |                |
|                                    | W    | 0.0    | 0.2503 | 0.1254 | 1.9995    | 0.1593 |                 |                  |                |
|                                    | O    | 0.1548 | 0.0    | 0.2112 | 1.0       | 0.1593 |                 |                  |                |
| W <sub>0.4</sub> Mo <sub>0.6</sub> | Ca   | 0.0    | 0.2504 | 0.6254 | 1.0       | 0.2611 | 7.56            | 5.71             | 1.32           |
|                                    | Mo   | 0.0    | 0.2504 | 0.1254 | 0.599     | 0.3982 |                 |                  |                |
|                                    | W    | 0.0    | 0.2504 | 0.1254 | 0.400     | 0.3982 |                 |                  |                |
|                                    | O    | 0.1521 | 0.0101 | 0.2115 | 1.0       | 0.3742 |                 |                  |                |
| W <sub>0.5</sub> Mo <sub>0.5</sub> | Ca   | 0.0    | 0.2495 | 0.6248 | 1.0       | 0.2322 | 7.13            | 5.85             | 1.21           |
|                                    | Mo   | 0.0    | 0.2504 | 0.1249 | 0.499     | 0.2322 |                 |                  |                |
|                                    | W    | 0.0    | 0.2504 | 0.1249 | 0.500     | 0.2322 |                 |                  |                |
|                                    | O    | 0.1546 | 0.0082 | 0.2105 | 1.0       | 0.2322 |                 |                  |                |
| W <sub>0.6</sub> Mo <sub>0.4</sub> | Ca   | 0.0    | 0.2495 | 0.6252 | 1.0       | 0.4022 | 9.12            | 5.25             | 1.73           |
|                                    | Mo   | 0.0    | 0.2501 | 0.1254 | 0.3996    | 0.4154 |                 |                  |                |
|                                    | W    | 0.0    | 0.2501 | 0.1254 | 0.6004    | 0.4154 |                 |                  |                |
|                                    | O    | 0.1553 | 0.0110 | 0.2125 | 1.0       | 0.4208 |                 |                  |                |
| W <sub>0.8</sub> Mo <sub>0.2</sub> | Ca   | 0.0    | 0.2495 | 0.6254 | 1.0       | 2.3087 | 10.04           | 15.32            | 0.65           |
|                                    | Mo   | 0.0    | 0.2504 | 0.1254 | 0.1879    | 0.4755 |                 |                  |                |
|                                    | W    | 0.0    | 0.2504 | 0.1254 | 0.8120    | 0.4755 |                 |                  |                |
|                                    | O    | 0.1579 | 0.0037 | 0.2099 | 1.0       | 2.2860 |                 |                  |                |
| CaWO <sub>4</sub>                  | Ca   | 0.0    | 0.2499 | 0.6249 | 1.0       | 0.2064 | 6.88            | 10.81            | 0.63           |
|                                    | W    | 0.0    | 0.2500 | 0.1250 | 1.0       | 0.2644 |                 |                  |                |
|                                    | O    | 0.1624 | 0.0224 | 0.2126 | 1.0       | 0.2645 |                 |                  |                |

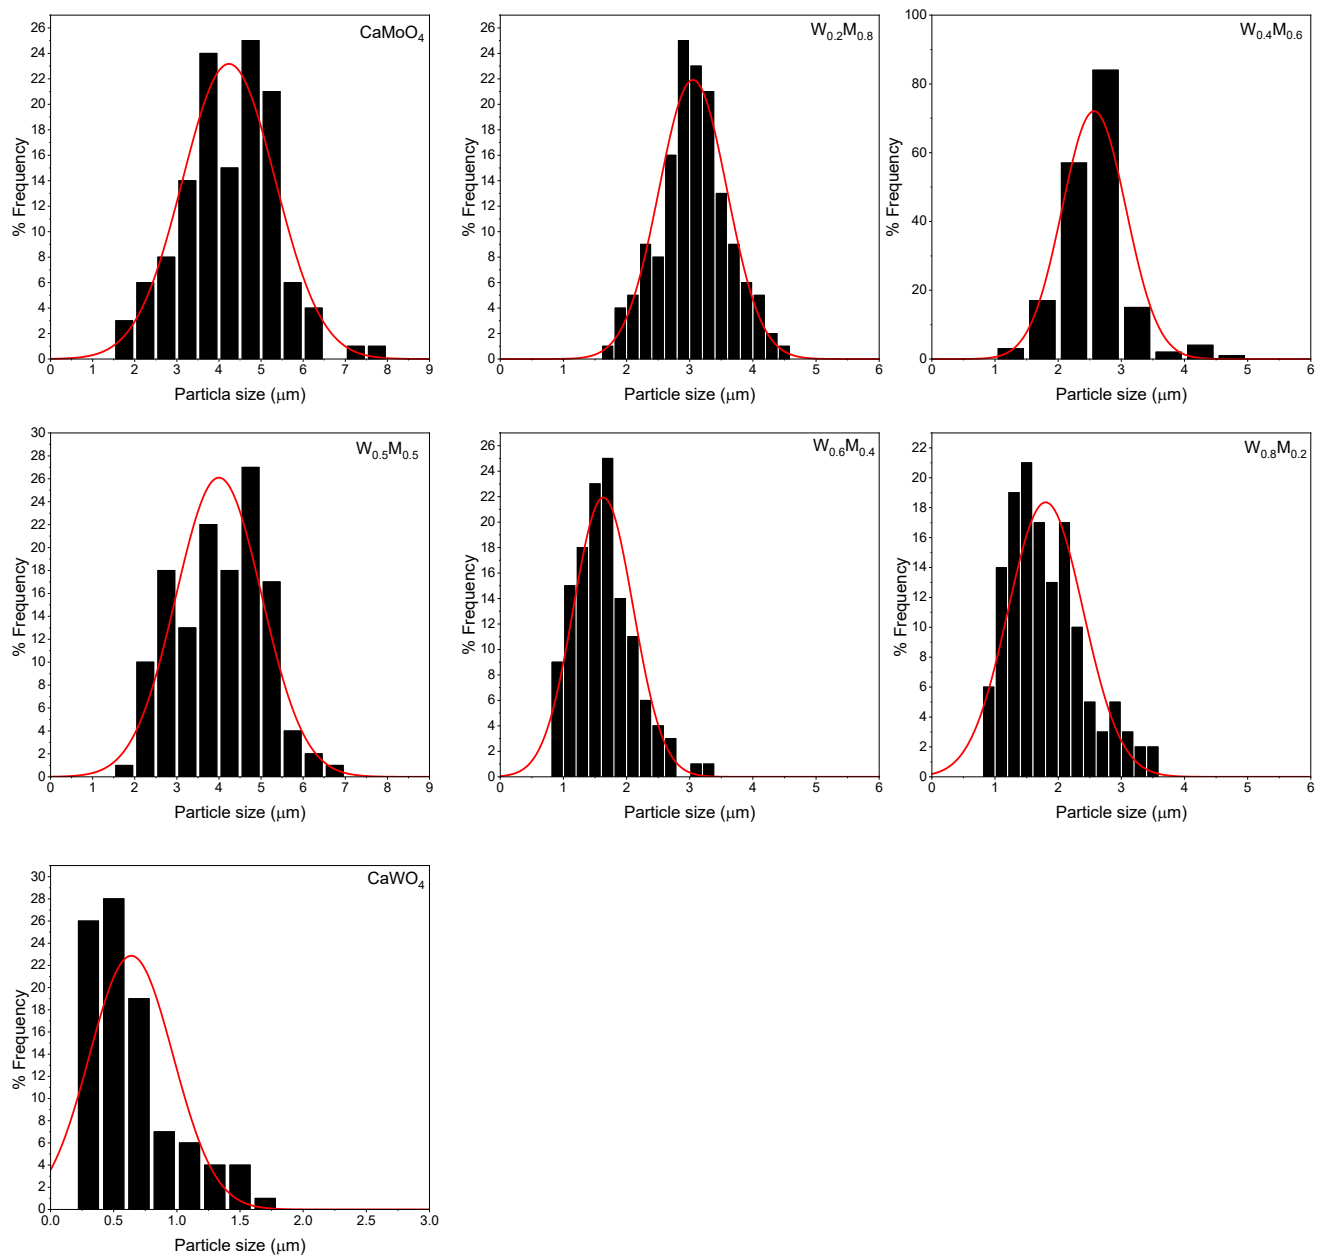

Figure S1. Particle Size distribution of the prepared solid solution samples

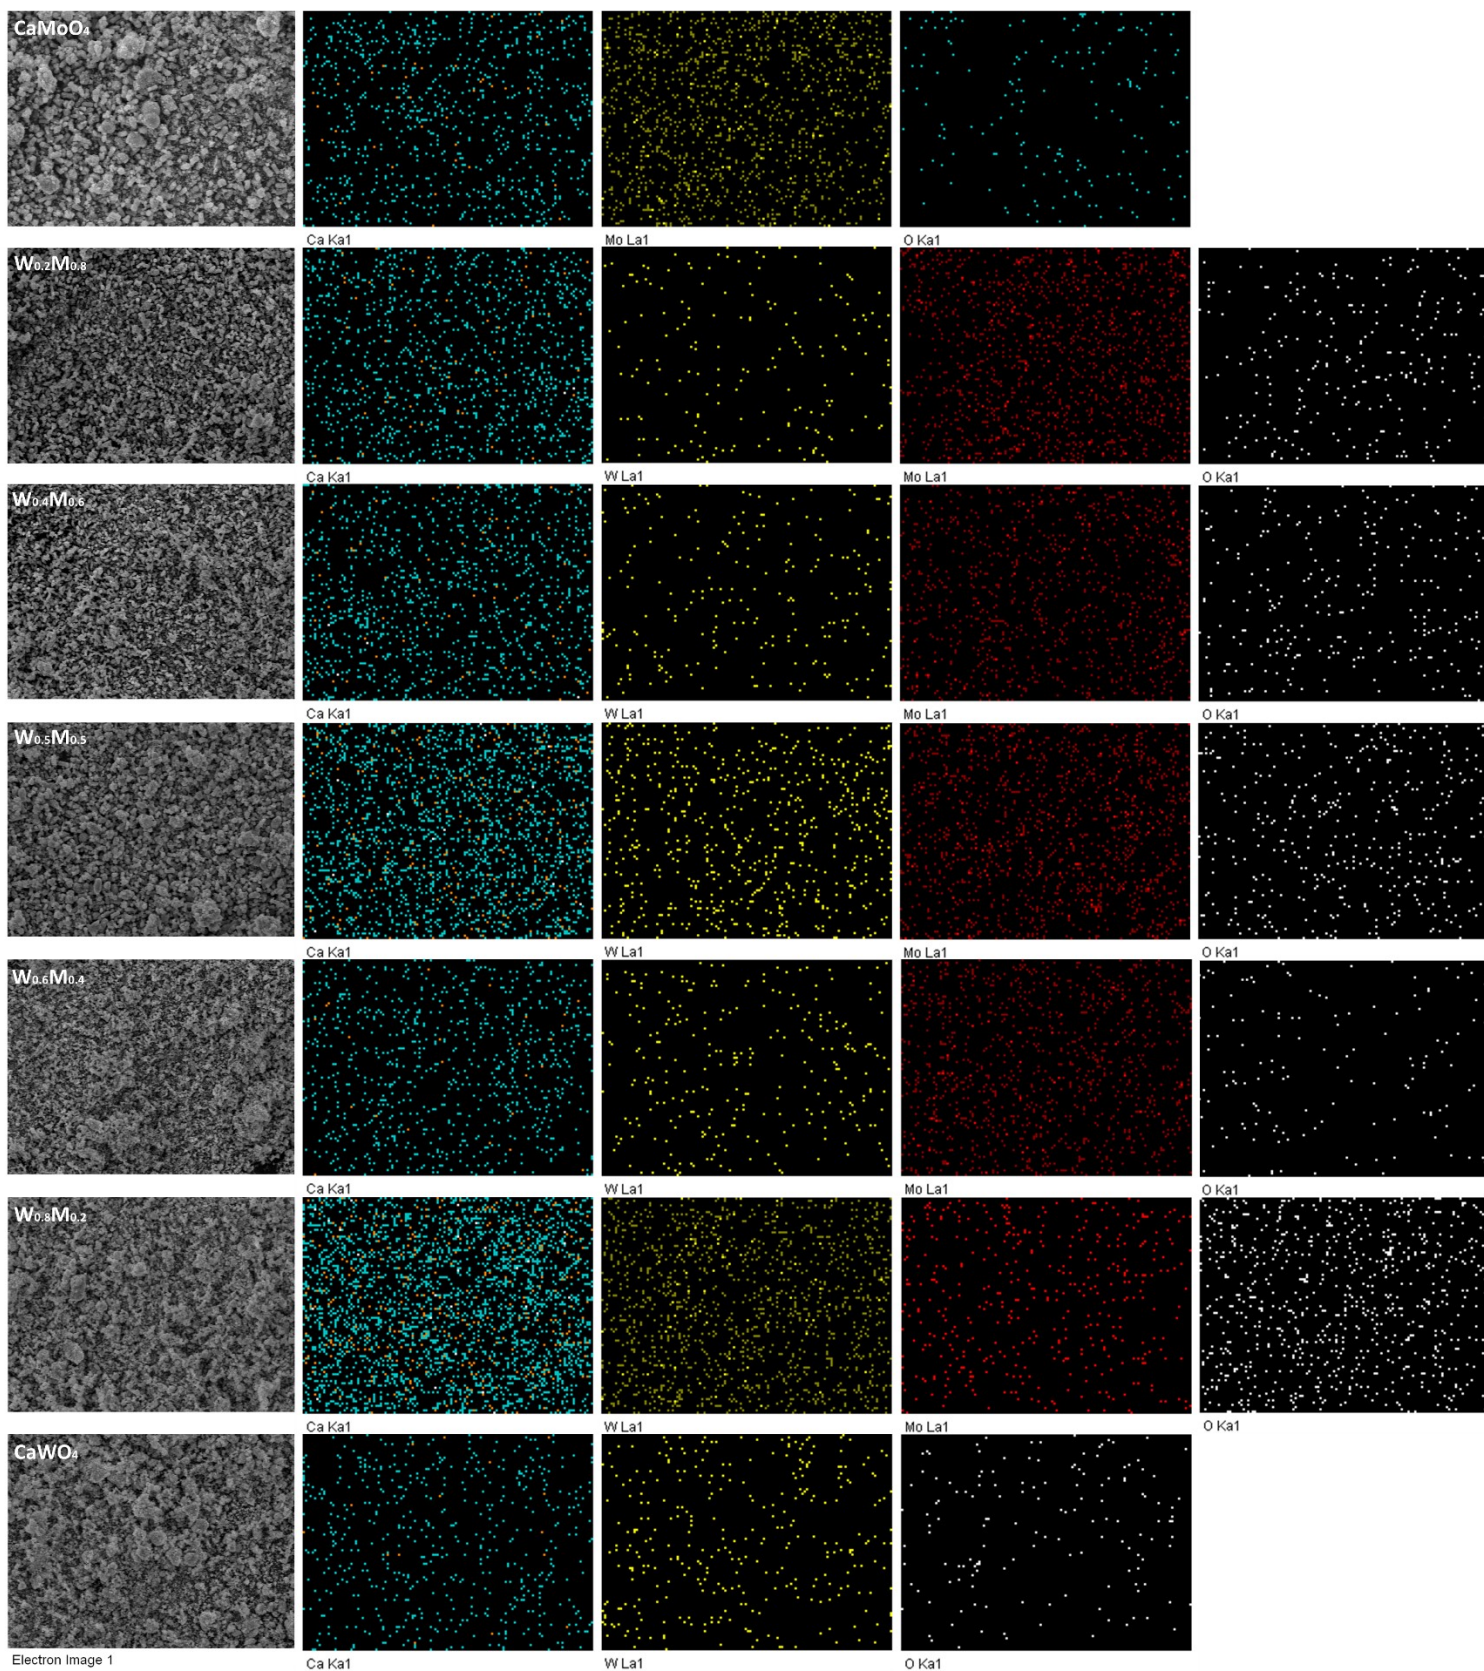

Figure S2. Elemental mapping of the solid solution samples

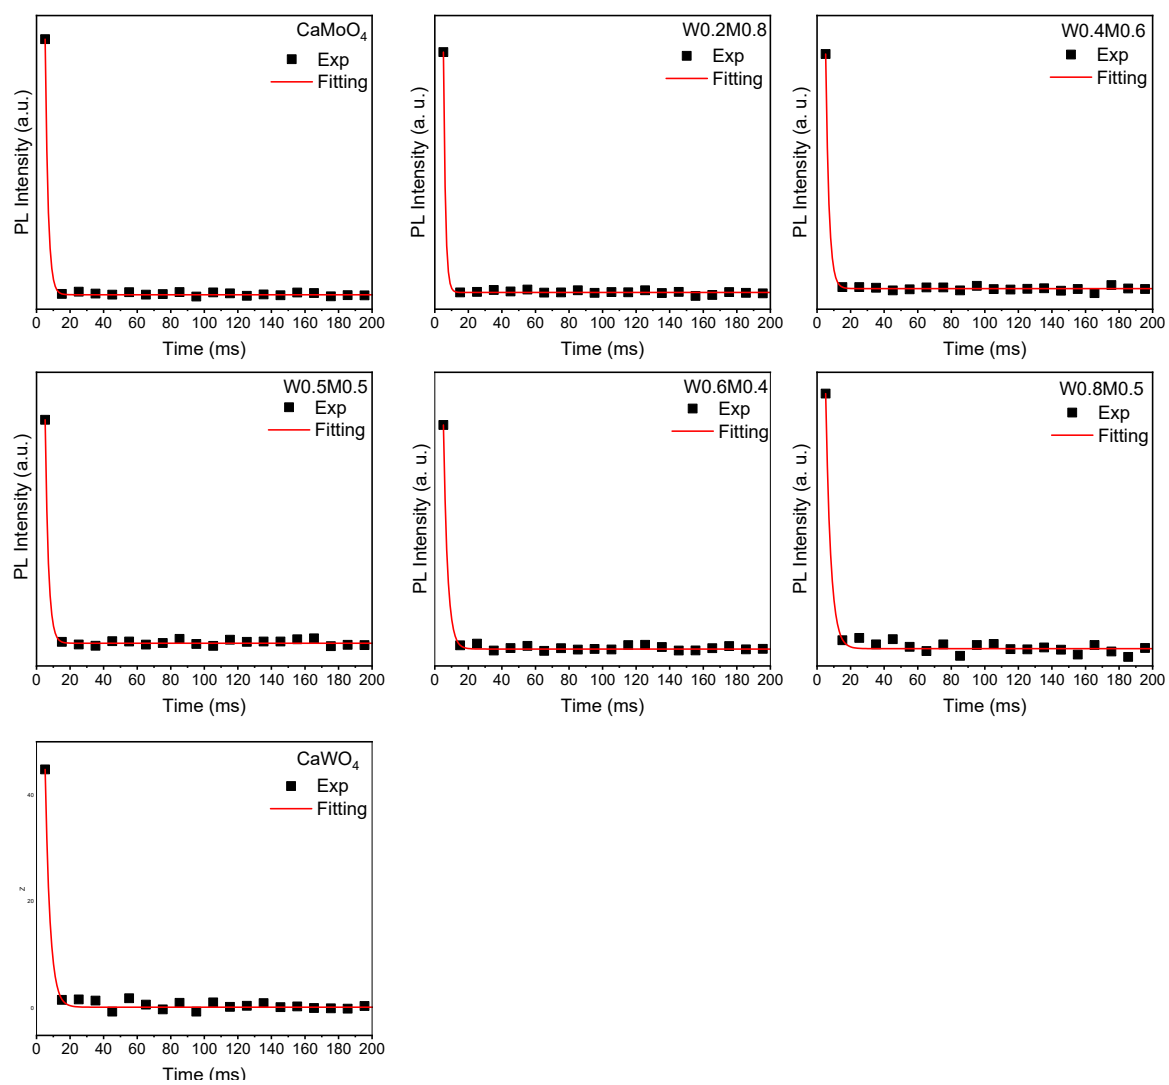

Figure S3. PL lifetime curves
